# Supplementary material for: Seedling root system adaptation to water availability during maize domestication and global expansion
Source: Springer Nature journal article supplement (doi:10.1038/s41588-024-01761-3), 2024-05-22
Supplement: MOESM1 [file 41588_2024_1761_MOESM1_ESM.pdf]

# Seedling root system adaptation to water availability during maize domestication and global expansion

---

In the format provided by the authors and unedited

---

1 **Supplementary Materials**

2

3 This PDF file includes:

4 Supplementary Materials and Methods

5 Supplementary Figs. 1 to 17

6

## 7 **Supplementary Materials and Methods**

### 8 **Maize mutants and population resources**

9 Two near isogenic background lines (Ia5125 and IL101t) that differ in the presence of the recessive  
10 maize mutation *sugary1* (*su1*) and *shrunk2* (*sh2*) that enhance kernel sweetness<sup>21</sup> were used to test  
11 the effect of kernel starch and sugar levels on seminal roots. The maize mutant *rootless concerning*  
12 *crown and seminal roots* (*rtcs*) is defective in seminal root initiation during embryogenesis<sup>84</sup>.

13 An introgression library (IL) containing 68 BC<sub>5</sub>F<sub>5</sub> near isogenic lines was surveyed to understand the  
14 effect of a donor source genome in a common recipient genetic background using the Northern Flint  
15 traditional variety Gaspé Flint and the reference line B73 as donor and recipient genotypes,  
16 respectively<sup>22</sup>.

17 A Mexican traditional varieties Multi-parent Advanced Generation InterCrosses (MAGIC) population was  
18 analyzed to explore local adaptation and functional diversity in Mexican native maize. Eight traditional  
19 varieties accessions were selected to cover major ecological groups<sup>85</sup> and biogeographic regions<sup>86</sup>. Five  
20 of the traditional varieties donors were represented by heterogeneous open-pollinated varieties (OPVs)  
21 provided by CIMMYT. Three of the donors of traditional varieties were partially inbred stocks, previously  
22 derived from OPVs<sup>87</sup>. The eight donors (A-H) were crossed in an 8-way MAGIC<sup>88</sup> scheme: first, four F<sub>1</sub>-  
23 hybrids were generated (AxB; CxD; ExF; GxH), then 4-way hybrids ([AxB] x [CxD]; [ExF] x [GxH]), and  
24 then an 8-way mix. A single individual was used per F<sub>1</sub>-cross, ensuring that only one haplotype was  
25 captured per donor. The 8-way mix was intermated for three generations by sibling cross before three  
26 rounds of self-pollination produced partially inbred S3 families. S3 families were bulked by sibling mating  
27 and tissue pooled from 5 S3 individuals for genotyping using the Illumina 50K chip. Analysis of  
28 genotyping data for parents, F<sub>1</sub> plants and derived families allowed the definition of the 8 captured  
29 parental haplotypes across ~20k polymorphic SNPs and calling of the same sites in the MAGIC families.

### 30 **Imaging of maize root system in soil by MRI**

31 To visualize root systems in soil, representative genotypes with different seminal root traits including  
32 teosinte I.A.12 (Ames 21793), the traditional varieties Navajo tribe (PI 311229) and Guatemala110 (PI  
33 490825) and the modern inbred lines C30 (Ames 26815) and CML289 (Ames 32336) were investigated  
34 via MRI. In brief, the seeds were placed in a Petri dish on wet filter paper. The Petri dish was sealed  
35 with parafilm and stored lightproof for 24 h in the growth chamber (16 °C/20 °C night/day temperature,  
36 14 h light per day, 60% relative humidity) to induce germination. Seeds were subsequently planted in  
37 pots with 8 cm inner diameter and 40 cm height using field soil (Sp2.1, Landwirtschaftliche  
38 Untersuchungs- und Forschungsanstalt Lufa, Speyer, Germany). Soil moisture was kept at 40% of the  
39 maximal water holding capacity (water content 8.9%<sub>om/m</sub>). Lighting was provided by 400 W HPI (Philips,  
40 Hamburg, Germany) and 400 W SON-T lamps (Philips, Hamburg, Germany), which alternated every 2  
41 h with 5 min overlap, giving PAR intensities between 350 and 450 μmol m<sup>-2</sup> s<sup>-1</sup> at canopy level with  
42 improved light spectrum compared to just one lamp type. The MRI images were acquired on a 4.7 T  
43 vertical magnet equipped with a Varian console<sup>89</sup> utilizing a birdcage RF coil with a 10 cm diameter. A  
44 multislice spin echo sequence was used with the following sequence parameters: 0.5 mm resolution, 1  
45 mm slice thickness, 9.6 cm field of view, TE = 9 ms, TR = 2.85 s, Bandwidth = 156 kHz, two averages.  
46 Using this protocol, roots down to 300 μm diameter were visualized<sup>89</sup>. The Varian console was replaced  
47 by a MR Solutions (Guildford, UK) console. Due to the new console and the different soil used slight  
48 adjustments to the sequence parameters were necessary (TR = 2.8s, Bandwidth = 400 kHz, four  
49 averages). Measurements were performed on 9, 17 and 24 days after planting.

### 50 **Non-invasive imaging of maize embryos by MRI**

51 To explore whether embryo size is associated with the number of seminal roots, we applied a non-  
52 destructive MRI imaging method to visualize and calculate the volume of the embryo for 50  
53 representative maize traditional varieties. In brief, MRI measurements of the dry maize kernels were  
54 performed on an Avance Neo 500 MHz Super Wide Bore NMR-spectrometer (Bruker Biospin) equipped  
55 with a 760 mT/m gradient system and a 1H probe head. The Spin Echo (SE) pulse sequence<sup>90</sup> with a  
56 repetition time of 1000 ms and echo time of 2.2 ms was used for the simultaneous 3D-analysis of up to  
57 50 maize kernels. The field of view (FOV) was set to 53 mm x 45 mm x 45 mm with a matrix image size  
58 of 118 mm x 100 mm x 100 mm. Excitation and refocusing pulses with bandwidth of 3750 Hz were

59 applied to measure the total MR signal of the samples. To optimize the signal-to-noise ratio, the datasets  
60 were averaged 32 times leading to a total measurement of 88 h 53 min. Image processing and volumetric  
61 analysis were performed using MATLAB software (vR2019b, The MathWorks, Natick, MA, USA) and  
62 AMIRA software (Amira3D 2022.1, ThermoFisher Scientific, Inc., Schwerte, Germany).

### 63 **Seed phenotyping of the US Ames inbred panel**

64 To explore the relationship between seed size and seminal root number, we customized a high-  
65 throughput seed phenotyping method combined with image analysis using LemnaGrid (v1.0) analysis  
66 software (<https://www.lemnatec.com/analysing-seeds>). In brief, dry maize seeds of the Ames panel  
67 were arranged manually on a blue background and scanned by a high-resolution scanner (Epson 14000,  
68 Epson, Meerbusch, Germany). The area of embryo and endosperm from resulting images were detected  
69 and quantified by LemnaTec (Aachen, Germany) analytical software. Ten kernels per accession were  
70 analyzed via image processing and the fractions of the embryo and endosperm in each kernel were  
71 separately calculated. The size and ratio of the embryo to the whole seed area were correlated with the  
72 number of seminal roots across the whole Ames panel.

### 73 **Root system architecture phenotyping using maize traditional varieties**

74 To obtain architectural root traits from traditional varieties across different geographic regions, we used  
75 218 US maize traditional varieties accessions and germinated them for three days in a paper roll  
76 system<sup>45</sup>. We randomly selected these varieties based on different classifications of geographic regions  
77 in the US and Canada and by considering the seminal root number variation (Supplementary Table 7).  
78 The equally germinated seeds were then transferred to the rhizobox system (60 cm × 40 cm × 40 cm)  
79 with 25 slides (45 cm × 35 cm) supplied with 10 l of deionized water. Each germinated seed was fixed  
80 on top of the blue paper (30 cm × 20 cm) attached on each slide. Additional germination paper was used  
81 to cover the germinated seed for maintaining the humidity of the whole system. The deionized water  
82 was supplied after 5-day growth and the seedlings were harvested after 9 days grown in this system.  
83 The fully developed root system on each blue background was scanned with an Epson scanner 14000  
84 (Meerbusch, Germany), and the resulting images were analyzed accordingly.

### 85 **Modelling of root hydraulic properties in maize traditional varieties**

86 To understand how seminal root number associates with soil-plant water transmission, sixty-six maize  
87 traditional varieties from the subset of 218 US traditional varieties were grown under a photoperiod of  
88 12 h, day/night temperature of 22 °C and relative humidity average of 50%. These sixty-six traditional  
89 maize varieties are representative of different geographic regions in the US and have different numbers  
90 of seminal roots (Supplementary Table 8). Plants were grown in 0.5L pots filled with 385 g of sandy soil.  
91 The soil was sieved before filling the pot with particles size of 1 mm to remove aggregates and to ensure  
92 homogeneous soil packing. The soil-filled pots were watered and the seeds were potted with one plant  
93 per pot in the three replicates for each genotype. The soil was covered with plastic beads to minimize  
94 soil evaporation. The plants were watered continuously. Transpiration measurement started after 10-15  
95 days. Transpiration rates were obtained gravimetrically by weighing the pots at three-hour intervals. At  
96 the end of the measurement the leaf area of each plant was measured using the leaf area meter  
97 instrument LI3000C (LI-COR bioscience GmbH, Bad Homburg, Germany) by scanning each leaf  
98 individually.

99 A soil-plant hydraulic model was used to investigate the effects of differences in seminal roots on  
100 transpiration reduction<sup>26,91-93</sup>. The model calculates water fluxes across the soil-plant-atmosphere  
101 continuum considering series of resistances. The fitting parameter is the effective root length that is  
102 active in water uptake, which makes this model ideal to test differences in seminal roots and their length  
103 (Supplementary Table 14).

104 We used a simplified model that calculates series of resistances between the bulk soil, soil-root interface,  
105 and through the root to the leaf xylem. Water flow in the soil follows Darcy-Buckingham's equation,  
106 ignoring gravity:

$$107 \quad q = -K_s(\psi_{soil}) \frac{\partial \psi_{soil}}{\partial r} \quad (\text{Eqn S1})$$

108 Where  $q$  is the water flux ( $\text{cm s}^{-1}$ ),  $K_s$  is the soil hydraulic conductivity ( $\text{cm}^2 \text{s}^{-1} \text{hPa}^{-1}$ ), which is the function  
109 of the soil matric potential  $\psi_{soil}$  (hPa, 1 hPa  $\approx$  1 cm),  $r$  is the radial distance (cm), and  $\frac{\partial \psi_{soil}}{\partial r}$  is the gradient

110 in the matric potential. Note that  $K_s$  has units of ( $\text{cm s}^{-1}$ ) when the soil matric potential is expressed in  
 111 heads unit.

112 The boundary conditions were expressed as follows:

$$113 \quad q(r_0) = \frac{E}{2\pi r_0 L}, \quad (\text{Eqn. S2})$$

$$114 \quad q(r_b) = 0, \quad (\text{Eqn. S3})$$

115 where  $r_0$  and  $r_b$  are the root radius and the exterior radius of soil around the root (cm),  $E$  is the  
 116 transpiration rate ( $\text{cm}^3 \text{s}^{-1}$ ),  $L$  is the active root length in water uptake (cm).  $r_b$  is determined by  $L$  and  $V$ ,  
 117 the volume of the column ( $\text{cm}^3$ ), according to:

$$118 \quad r_b = \sqrt{\frac{V}{\pi L}} \quad (\text{Eqn. S4})$$

119 The soil hydraulic conductivity was determined according to the Brooks and Corey (1966) model<sup>94</sup>:

$$120 \quad K_s(\psi_{soil}) = K_{sat} \left( \frac{\psi_{soil}}{\psi_0} \right)^\tau, \quad (\text{Eqn. S5})$$

121 where  $K_{sat}$  is the saturated hydraulic conductivity of the soil ( $\text{cm s}^{-1}$ ),  $\psi_0$  is the soil air entry value (hPa),  
 122 and  $\tau$  is a fitting parameter (-). From matching the PDI model<sup>95</sup> and Brooks and Corey model<sup>94</sup> for the  
 123 experimentally-measured series of potentials we obtained the parameters for Eqn. S5. According to de  
 124 Jong van Lier *et al.* (2008)<sup>96</sup>, and assuming a steady-rate water flow in the soil, Eqn. S1 was reformulated  
 125 using the matric flux potential ( $\Phi$ ,  $\text{cm}^2 \text{s}^{-1}$ ):

$$126 \quad \Phi(\psi_{soil}) = \int_{-\infty}^{\psi_{soil}} K_s(x) dx. \quad (\text{Eqn. S6})$$

127 Combining Eqn. 5, Eqn. 6, and the radial Richards equation, we obtain the flux boundary condition at  
 128 the root-soil interface,  $\psi_{root-soil}$ , according to Schröder *et al.*, (2009)<sup>97</sup>:

$$129 \quad \Phi_{root-soil} = -\frac{E}{2\pi L} \left( \frac{1}{2} - r_b^2 \frac{\ln(r_b/r_0)}{r_b^2 - r_0^2} \right) + \Phi_{soil}, \quad (\text{Eqn. S7})$$

130 where  $\Phi_{root-soil}$  is the matric flux potential at the root-soil interface ( $\text{cm}^2 \text{s}^{-1}$ ), and  $\Phi_{soil}$  is the matric flux  
 131 potential in the bulk soil ( $\text{cm}^2 \text{s}^{-1}$ ).  $\Phi_{root-soil}$  is obtained calculating Eqn. S5 and S6.

132 The water flow in the root system is given by

$$133 \quad E = -K_{root}(\psi_{root-soil} - \psi_{root-xylem}), \quad (\text{Eqn. S8})$$

134 where  $\psi_{root-xylem}$  and  $\psi_{root-soil}$  are the water potential at the root-soil interface and at the xylem collar  
 135 and  $K_{root}$  ( $\text{cm}^3 \text{s}^{-1} \text{MPa}^{-1}$ ) is the root conductance (assumed to be constant).

136

137 The water flow in the aboveground xylem is defined as:

$$138 \quad E = K_{xylem}(\psi_{xylem-root} - \psi_{leaf}) \quad (\text{Eqn. 9})$$

139 where  $K_{xylem}$  is the aboveground xylem conductance ( $\text{cm}^3 \text{MPa}^{-1} \text{s}^{-1}$ ), and  $\psi_{xylem-root} - \psi_{leaf}$  is the water  
 140 potential difference (driving force) between root and leaf (MPa).  $K_{xylem}$  is derived from  $K_{root}$  and  
 141 declines as leaf water potential falls below the xylem embolism threshold:

$$142 \quad K_{xylem}(\psi) = K_{root} \left( \frac{\psi_{leaf}}{\psi_{xylem_0}} \right)^{-\tau_x} \quad (\text{Eqn. 10})$$

143 where  $\psi_{xylem_0}$  is the water potential (MPa) at which emboli arise in the xylem, resulting in a decrease in  
 144  $K_{xylem}$ .  $\tau_x$  is a fitted parameter. The water flow in the plant is defined as:

$$145 \quad E = K_{plant}(\psi_{soil-root} - \psi_{leaf}) \quad (\text{Eqn. 11})$$

146 Similarly, the water flow in the soil-plant system is represented by a function of soil-plant hydraulic  
147 conductance and water potential difference between soil and leaf:

$$148 \quad E = K_{\text{soil\_plant}} (\psi_{\text{soil}} - \psi_{\text{leaf}}) \quad (\text{Eqn. 12})$$

149 The onset of hydraulic limitation is defined as the point at which the slope of  $E(\psi_{\text{leaf}})$  reaches 70% of its  
150 maximum.

### 151 **Lignin analysis and salt stress treatments in hydroponics**

152 To understand how root physiology is associated with the availability of water, we applied osmotic/salt  
153 stress to simulate a limited water availability in hydroponic solution. A total of 27 representative  
154 traditional varieties with contrasting numbers of seminal roots from this 218 traditional varieties panel  
155 collected from the US were investigated for stress resistance. 10 kernels per accession were sterilized  
156 and pregerminated in a paper roll system<sup>45</sup> with deionized water for three days. Germinated seeds were  
157 then transferred to half-strength Hoagland solution for another four days in hydroponics. The conditioned  
158 seedlings were then separately grown under control conditions with the same Hoagland solution and  
159 salt stress treatment using 160 mM NaCl, equivalent to a water potential of -0.8 MPa. The plants were  
160 harvested after six days of growth under these two treatments. The primary roots of those accessions  
161 were hand dissected from the root tip to the first emerged lateral root, and stored in 70% ethanol. The  
162 length and diameter of the dissected root segment were recorded for normalization of the data. Each  
163 biological replicate contains three independent primary roots from three seedlings each.

164 Root samples were enzymatically digested using 2% cellulase (Novozymes, Sigma-Aldrich, USA) and  
165 2% pectinase (Novozymes, Sigma-Aldrich, USA) dissolved in 0.01 M citric buffer (Carl Roth, Karlsruhe,  
166 Germany) with the pH adjusted to 3.0. To inhibit microbial growth, 1 mM of NaN<sub>3</sub> (Fluka, Sigma-Aldrich,  
167 USA) was added to the enzyme solution. Once every two days, the solution was changed until all  
168 lignified cell walls were free of non-lignified tissues. Isolated lignified cell walls were cleaned with 10 mM  
169 borate buffer, subsequently rinsed with deionized water (Carl Roth, Karlsruhe, Germany) and dried. The  
170 samples were weighed and about 2 mg of the sample were ground in a steel ball mill (Retsch MM400;  
171 Retsch GmbH, Haan, Germany) for 8 min at a 30 Hz frequency in 2 ml Eppendorf tubes. The powdered  
172 samples were vortexed thoroughly in 0.75 ml of acetone. This solution was transferred to pre-labeled,  
173 pre-weighed glass vials. Vials were placed on a heat block (MHR 23, HLC BioTech, Germany) to  
174 evaporate all the liquid in the vial, and the final dry matter was used for lignin analysis.

175 For chemical analysis of lignin, the samples were depolymerized by thioacidolysis<sup>98</sup>. This method was  
176 optimized for microanalysis following published work<sup>99</sup>. After thioacidolysis, samples were extracted with  
177 chloroform and spiked with dotriacontane (20 µg of dotriacontane in 100 µl of solution; Fulka, Sigma-  
178 Aldrich, USA) as an internal standard. GC-FID (CG-Hewlett Packard 5890 series H, Agilent) analysis  
179 was used to quantify lignin samples, and GC-MS (quadrupole mass selective detector HP 5971, Hewlett  
180 Packard, Agilent) analysis was used to identify individual lignin monomers. 1 µl of each sample was  
181 analyzed on 30 m GC columns (DB-1 Columns, Agilent, USA) using split/splitless injection. The  
182 compounds were then identified using reference tables with molecular ion fragments from published  
183 studies<sup>100,101</sup>.

### 184 **Construction and sequencing of maize MAGIC population**

185 A Multiparent Advanced Generation Intercross (MAGIC) population was generated from eight Mexican  
186 native maize varieties sourced from across the Mexican environmental range, available from the  
187 CIMMYT germplasm bank. The eight founder parents and associated environmental data are provided  
188 further in Supplementary Table 15.

189 To make the MAGIC population, outbred accessions OAXA521, NAYA15 and JALI43 were substituted  
190 by the related inbred derivatives MR23 (Ames 30536), MR18 (Ames 30532) and MR21 (Ames 32914),  
191 respectively. In the first generation, four F1 stocks were generated by making the crosses AxB, CxD,  
192 ExF and GxH. In the second generation, a single individual per F1 was used as both male and female  
193 to make the four-way hybrids (AxB)x(CxD), (CxD)x(GxH), (GxH)x(ExF) and (ExF)x(AxB). The use of  
194 single F1 individuals ensured the population captured only 8 founding haplotypes despite the use of  
195 outbred founders. 120 seeds were advanced per four-way hybrid. In the third generation, eight-way

196 pools were made by mating individuals of (A×B)×(C×D) with those of (G×H)×(E×F), and separately those  
197 of (C×D)×(G×H) with (E×F)×(A×B). 80 ears (families) were advanced from each of the two eight-way  
198 pools. In a first cycle of intermating individuals from the 80 families in the first eight-way pool were  
199 crossed with this in the second, with no more than one cross between any two given families. 500 ears  
200 were recovered from the first intermating and a single seed per ear advanced to generate 500 seed  
201 bulks. In a second cycle of intermating, individuals from five 500 seed bulks were randomly crossed  
202 within bulks. Progeny were pooled across bulks to give 474 ears, again advanced as single seed. A  
203 third cycle of intermating used three 474 seed bulks, again individuals randomly mated within bulks and  
204 progeny pooled across bulks, recovering 390 ears. Three 390 bulks were self-pollinated and the  
205 recovered ears advanced ear-to-row through two more generations of self-pollination to generate the  
206 final Mexico MAGIC (MEMA) families. A pilot set of 129 families was genotyped using an Illumina 3k  
207 SNP array (<https://www.illumina.com/products/by-type/microarray-kits/maize-ld.html>) and evaluated for  
208 SRN. Founder parents and F1 individuals were also genotyped to allow founder haplotypes to be  
209 inferred using a standard triplet approach. SNP association with SRN was performed with R/qtl2 (doi:  
210 10.1534/genetics.118.301595) using the R/qtl2::scan1snps function controlling for residual population  
211 structure with a kinship calculated by R/qtl2::calc\_kinship under the loco option. SRN was estimated for  
212 “pseudoparents” (i.e. individuals homozygous for each of the eight founder haplotypes) using R/rrBLUP  
213 (doi:10.3835/plantgenome2011) to estimate marker effects from the 129 MEMA families. Ten estimates  
214 were calculated for each parental haplotype based on setting marker effects for each of the ten  
215 chromosomes in turn to zero. Effects for the 8 parental alleles were estimated using R/qtl2::scan1 and  
216 parental genotype probabilities calculated with R/qtl2::calc\_genoprob.

#### 217 **Estimation of different germplasm for seminal root number**

218 We first compiled the two published datasets from US<sup>43</sup> and European<sup>44</sup> maize inbred panels. Liu et al.  
219 (2003)<sup>43</sup> calculated the maximum-likelihood estimates of the allelic constitution of an inbred group or  
220 specific inbred line, given different proportions of ancestry from the four historical germplasm pools  
221 (Southern Dent, Northern Flint, Tropical Highland maize, and Tropical Lowland maize). Gouesnard et  
222 al. (2017)<sup>44</sup> performed the AMIXTURE analysis and identified seven different genetic ancestries (Italy,  
223 Argentina, Popcorn, Lacaune, Dent, Northern flint and Pyrenees-Galicia) based on the European  
224 germplasm. Since the classification of the germplasm groups differed between US and European, we  
225 performed the Pearson correlation analysis separately.

#### 226 **Identification of the transposon-induced mutants**

227 To verify candidate genes from GWAS, we next identified potential loss-of-function maize mutations by  
228 exploring our in-house sequence indexed collection *BonnMu*<sup>29</sup>. Mutants of the *BonnMu* resource were  
229 derived from Mutator-tagged F<sub>2</sub>-families in various genetic backgrounds, such as B73 and F7. All 160  
230 candidate genes generated from the GWAS analysis were screened through our mutant stocks. In brief,  
231 the F<sub>2</sub> segregating seeds were phenotyped in paper-roll culture and the seedling plants were scanned  
232 using the scanner Expression 12000XL (Epson, Suwa, Japan). Seminal root number, primary root length  
233 and lateral root density were recorded. Statistical analyses were performed by pair-wise Student's *t*  
234 tests with *F* statistics.

#### 235 **Drought tolerance trials using traditional varieties and the *rtcs* mutant**

236 To understand whether different traditional maize varieties have variable capacity in tolerance to drought,  
237 we grew 82 georeferenced varieties with different C (*n* = 41) and A (*n* = 41) allele variations of the gene  
238 *ZmHb77*. Note that in this drought experiment we used the small pot size (5 cm × 5 cm × 17 cm, length  
239 × width × depth) with one plant grown per pot using 500 g of the same soil mixture. We used the small  
240 pots because we have only a limited amount of seeds of the traditional varieties. The drought treatment  
241 was maintained with the similar strategy as described above with 22% soil water capacity. The shoot  
242 dry biomass was determined for both drought and well-watered conditions after 20-d of cultivation.

243 Moreover, we tested the drought tolerance and resilience of the *rtcs* mutant and its wild type that differed  
244 in seminal root number and lateral root branching. We performed the drought and recovery trials in the  
245 same small pot experiment. The reason why we used individual pots is that we had to genotype every  
246 plant separately to distinguish between mutant and wild type plants. Therefore, the cultivation box was  
247 not suitable for this experiment. We applied well-watered, drought and drought followed by re-watering

248 treatments to testify the drought tolerance and resilience as described above. The shoot dry biomass  
249 and stomatal conductance were recorded.

250



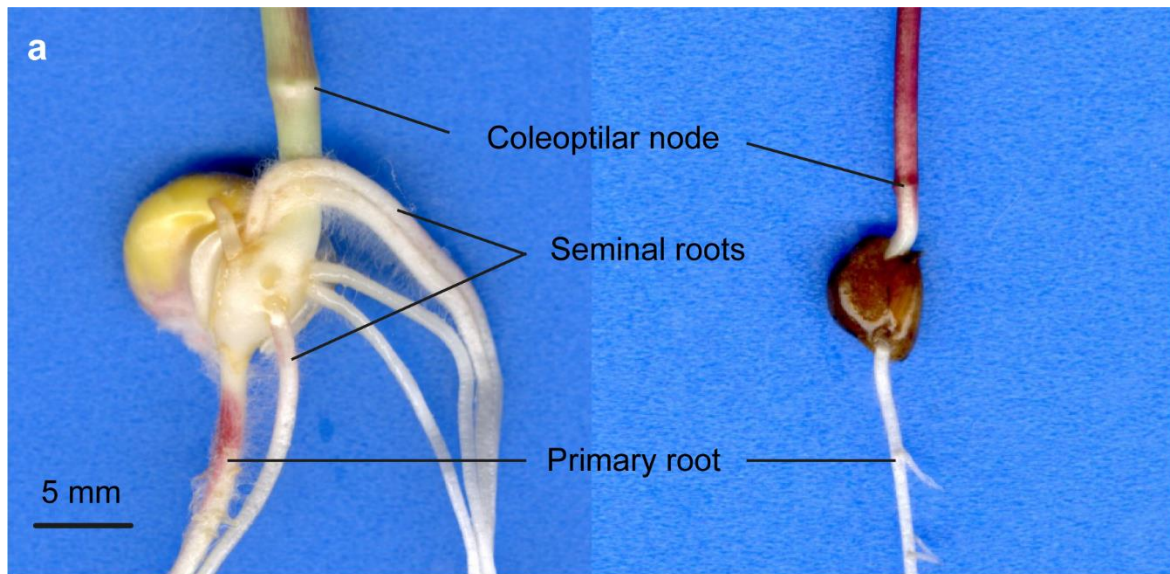

**Maize**  
(*Zea mays ssp. mays*)

**Teosinte**  
(*Zea mays ssp. parviglumis*)

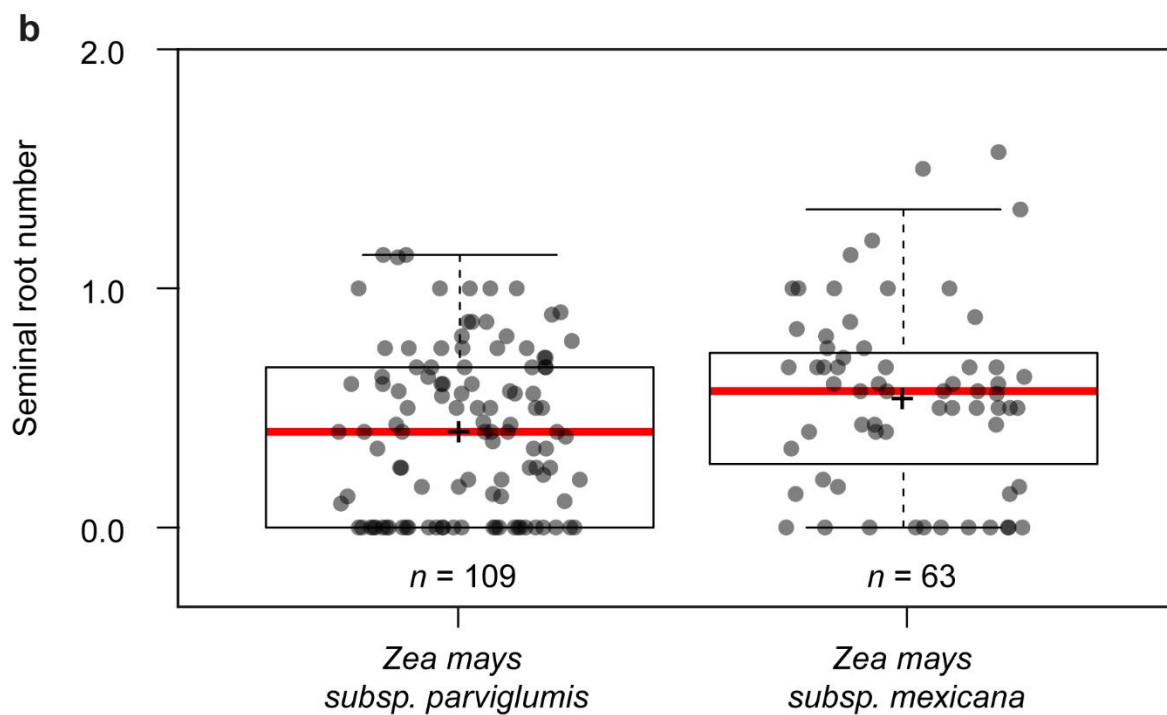

252

253 **Supplementary Fig. 1. Morphological differences in maize and teosinte root systems.** a, Visual  
 254 appearance of the maize and teosinte seedling root system. Seeds were germinated for 10 days in wet  
 255 paper-rolls before seedlings were scanned. b, Seminal root number of the wild lowland teosinte *Zea*  
 256 *mays ssp. parviglumis* and highland teosinte *ssp. mexicana*. Boxes span from the first to the third  
 257 quartiles, red lines represent the median and whiskers extend to 1.5x the interquartile range of the lower  
 258 and upper quartiles. Data points outside of whiskers represent outliers. According to two-sided Wilcoxon  
 259 rank sum test, SRN was significantly different at  $p = 0.0145$ .

260

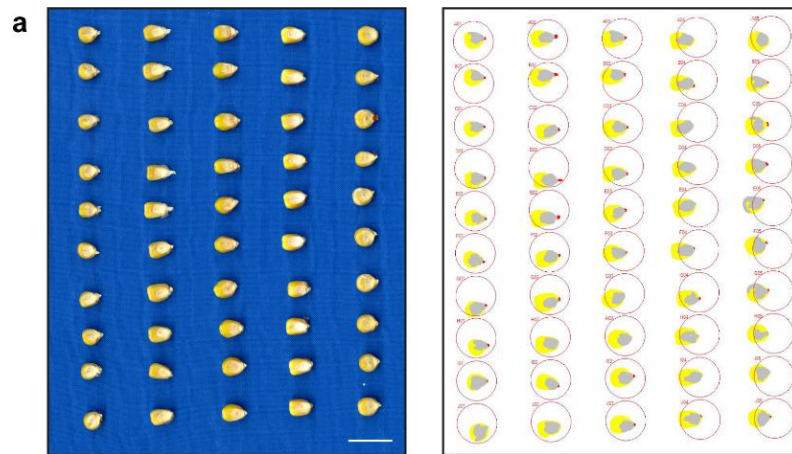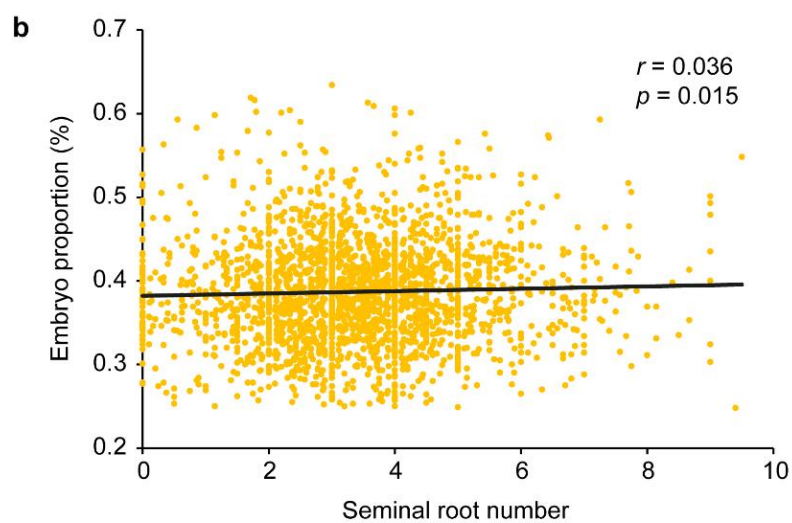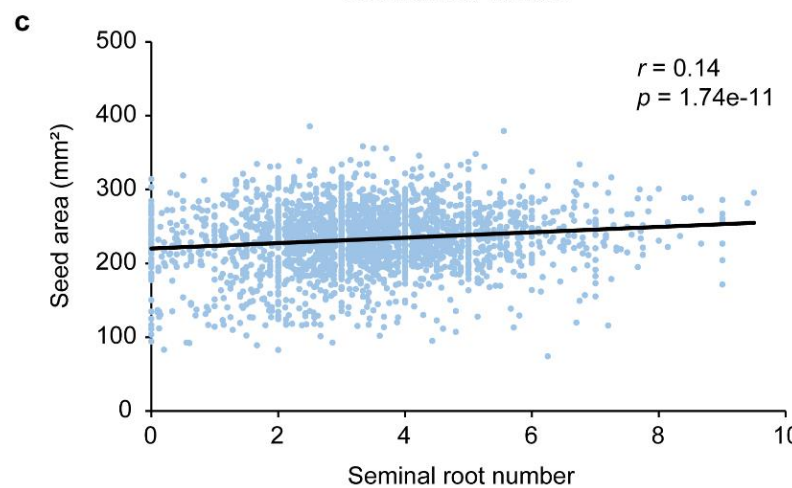

261 **Supplementary Fig. 2. Relationship between seminal root number and embryo size in maize**  
 262 **inbred lines.** Dry maize seeds were scanned at high-resolution and the resulting images were  
 263 processed in LemnaGrid (LemnaTech). **a**, The areas of embryo and endosperm were calculated  
 264 separately. Scale bar = 2 cm. The size of seed (**b**) and ratio of the embryo to the whole seed size (**c**)  
 265 were correlated with the number of seminal roots for the whole Ames panel. Scatter plots show best fit  
 266 (solid line) and 95% confidence interval (colour shading) for linear regression. For both **b** and **c**, two-  
 267 sided tests of significance with Bonferroni correction were performed to adjust the *P* value for multiple  
 268 independent tests. *n* = 2429.

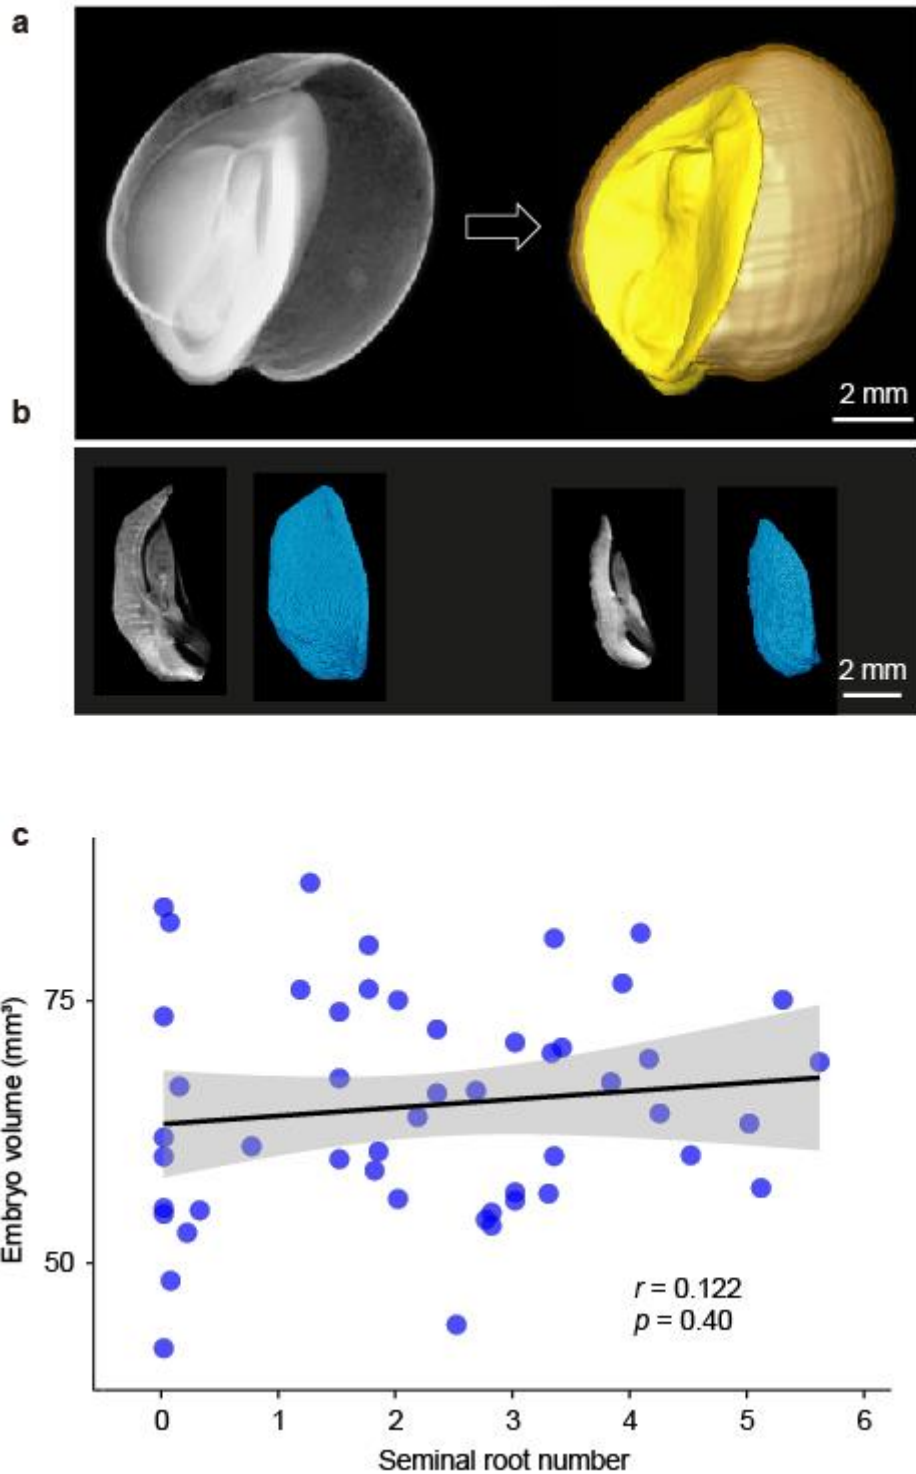

269 **Supplementary Fig. 3. Relationship between seminal root number and embryo size in maize**  
 270 **traditional varieties.** 3-D visualization of a dry maize seed (a) and embryo (b) by nuclear magnetic  
 271 resonance (NMR) imaging. (c) Scatter plot indicating the relationship between seminal root number and  
 272 the volume of dry embryos in maize traditional varieties collected from diverse geographical regions in  
 273 the US. Pearson correlation was performed and the  $p$  value indicates the probability at which the  
 274 correlation coefficient (solid line) is zero (null hypothesis) at 95% confidence interval (shaded area).  
 275 Two-sided test of significance with Bonferroni correction was performed to adjust the  $P$  value for the  
 276 multiple independent tests.  $n = 50$ .

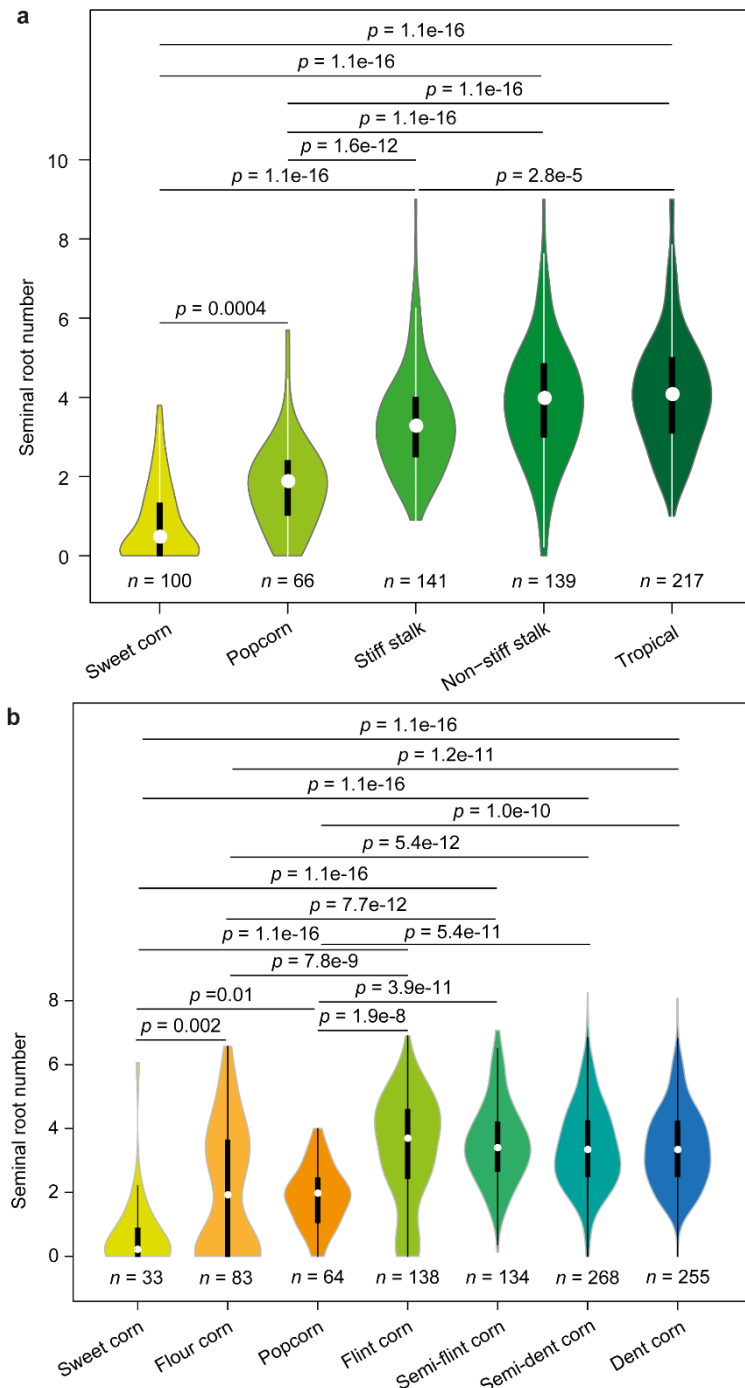

277 **Supplementary Fig. 4. Variation in seminal root number across different maize germplasm of**  
 278 **inbred lines (a) and traditional varieties (b).** The inbred lines are from the USDA-ARS North Central  
 279 Regional Plant Introduction Station (NCRPIS) in Ames, Iowa, and classified according to breeding  
 280 program of origin, with most of the US programs in the two major germplasm groups, recognized by  
 281 temperate maize breeders (referred to as stiff stalk and non-stiff stalk) and additional tropical origin. The  
 282 traditional variety accessions are contributed from NCRPIS and CIMMYT. The germplasm groups of  
 283 traditional varieties are derived from the narrative information of the US National Plant Germplasm  
 284 System (<https://npgsweb.ars-grin.gov/gringlobal>). The exact number of inbred lines or traditional  
 285 varieties are highlighted in the figure.  $n = 10$  biologically independent seedlings per inbred line and  $n =$   
 286  $20$  biologically independent seedlings per traditional variety. Violin plots show reaction norms and  
 287 phenotypic variation within indicated sample sizes of different germplasm groups. White dots represent  
 288 the median values and whiskers extend to  $1.5\times$  the interquartile range of the lower and upper quartiles.  
 289 Significant differences among means are indicated by exact values (one-way ANOVA, Tukey's HSD).

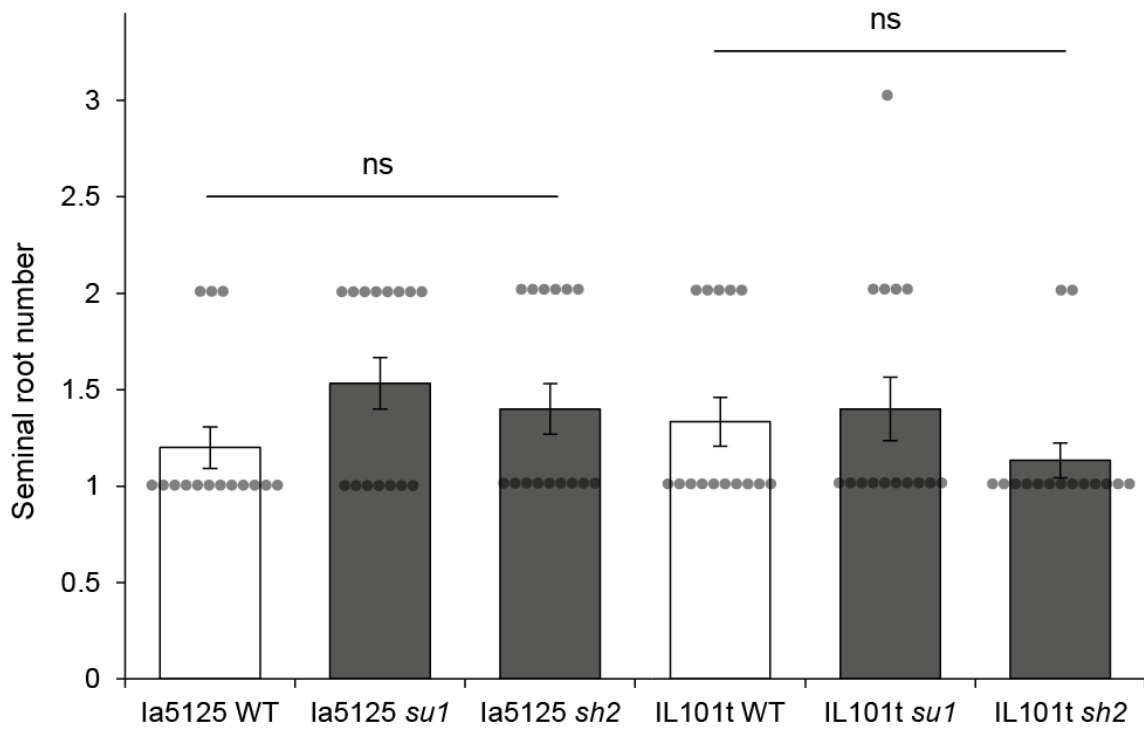

290

291 **Supplementary Fig. 5. Seminal root number of starch-related mutants and their wild types in**  
 292 **maize.** *sugary1* (*su1*) and *shrunkened2* (*sh2*) are mutant lines in endosperm starch biosynthesis. Mutant  
 293 alleles of *su1* and *sh2* in two different genetic backgrounds la5125 and IL101t were germinated and the  
 294 roots were scanned and counted. Significant differences were determined by one-way ANOVA with  
 295 Tukey HSD at  $p = 0.05$ ; ns, not significant. Data are presented as mean values +/- SEM and  $n = 10$   
 296 biologically independent seedlings per genotype.

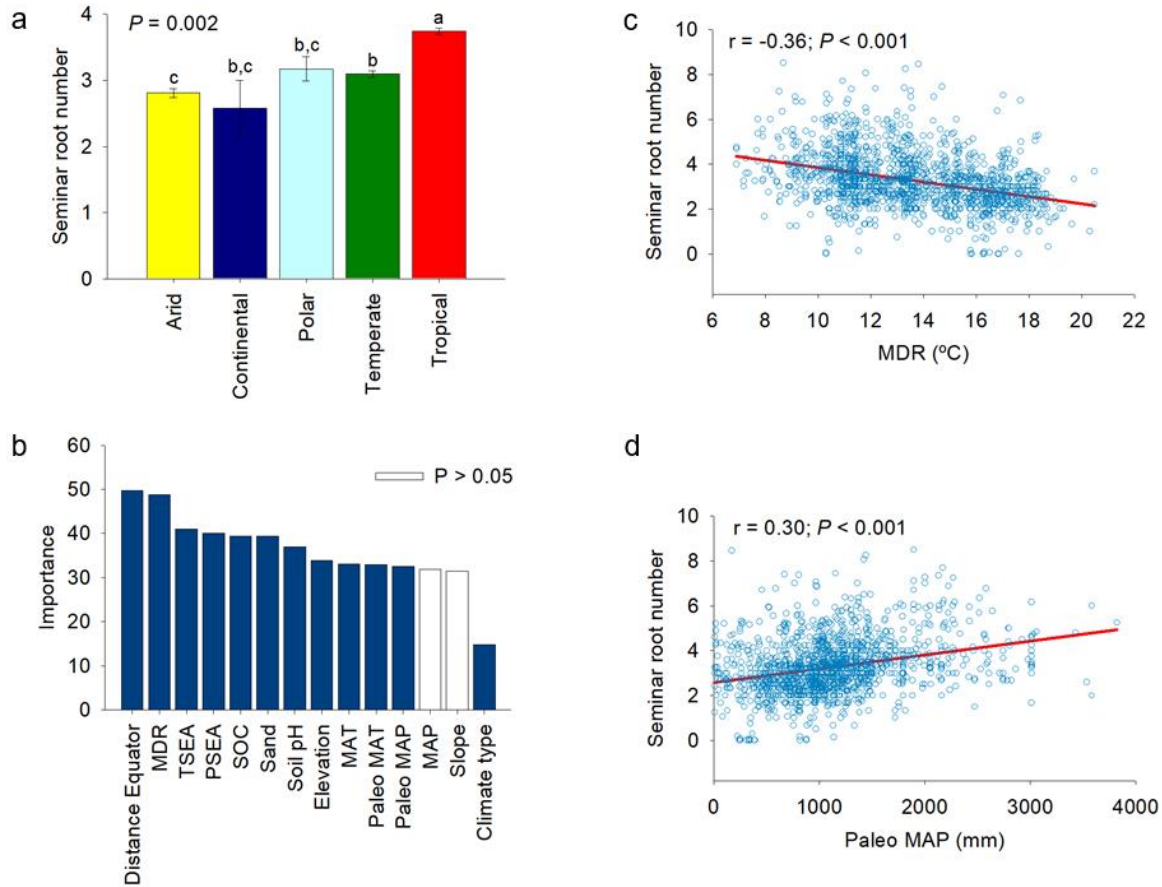

297

298 **Supplementary Fig. 6. Impact of environmental factors on seminal root number in maize**  
 299 traditional varieties. **a**, Comparison of seminal root numbers in maize lines originating from different  
 300 climate groups according to the Köppen-Geiger climate classification maps (v1; [http://koeppen-](http://koeppen-geiger.vu-wien.ac.at/present.htm)  
 301 [geiger.vu-wien.ac.at/present.htm](http://koeppen-geiger.vu-wien.ac.at/present.htm)). Significant differences were tested by one-way PERMANOVA  
 302 (Permutational Multivariate Analysis of Variance) with post-hoc test at  $p < 0.05$ . Arid ( $n = 317$ ),  
 303 continental ( $n = 16$ ), polar ( $n = 45$ ), temperate ( $n = 531$ ), tropical ( $n = 575$ ). Data are presented as mean  
 304 values +/- SEM. **b**, Relative importance of soil and climate factors on seminal root number as obtained  
 305 by a Random Forest machine learning approach. Pearson correlation between MDR (**c**) and Paleo MAP  
 306 (**d**) with seminal root number. The  $p$  value indicates the probability at which the correlation coefficient is  
 307 zero (null hypothesis). For both **c** and **d**, two-sided tests of significance with Bonferroni correction were  
 308 performed to adjust the  $P$  value for the multiple independent tests. MDR, mean diurnal temperature  
 309 range; PSEA, precipitation seasonality; TSEA, temperature seasonality; MAT, mean annual  
 310 temperature; MAP, mean annual precipitation; Paleo MAT and MAP are mid-Holocene MAT and MAP  
 311 (about 6000 years ago) as described<sup>102</sup>.  $n = 1484$  in panels **c** and **d**. Slope (terrain slope) in degrees.

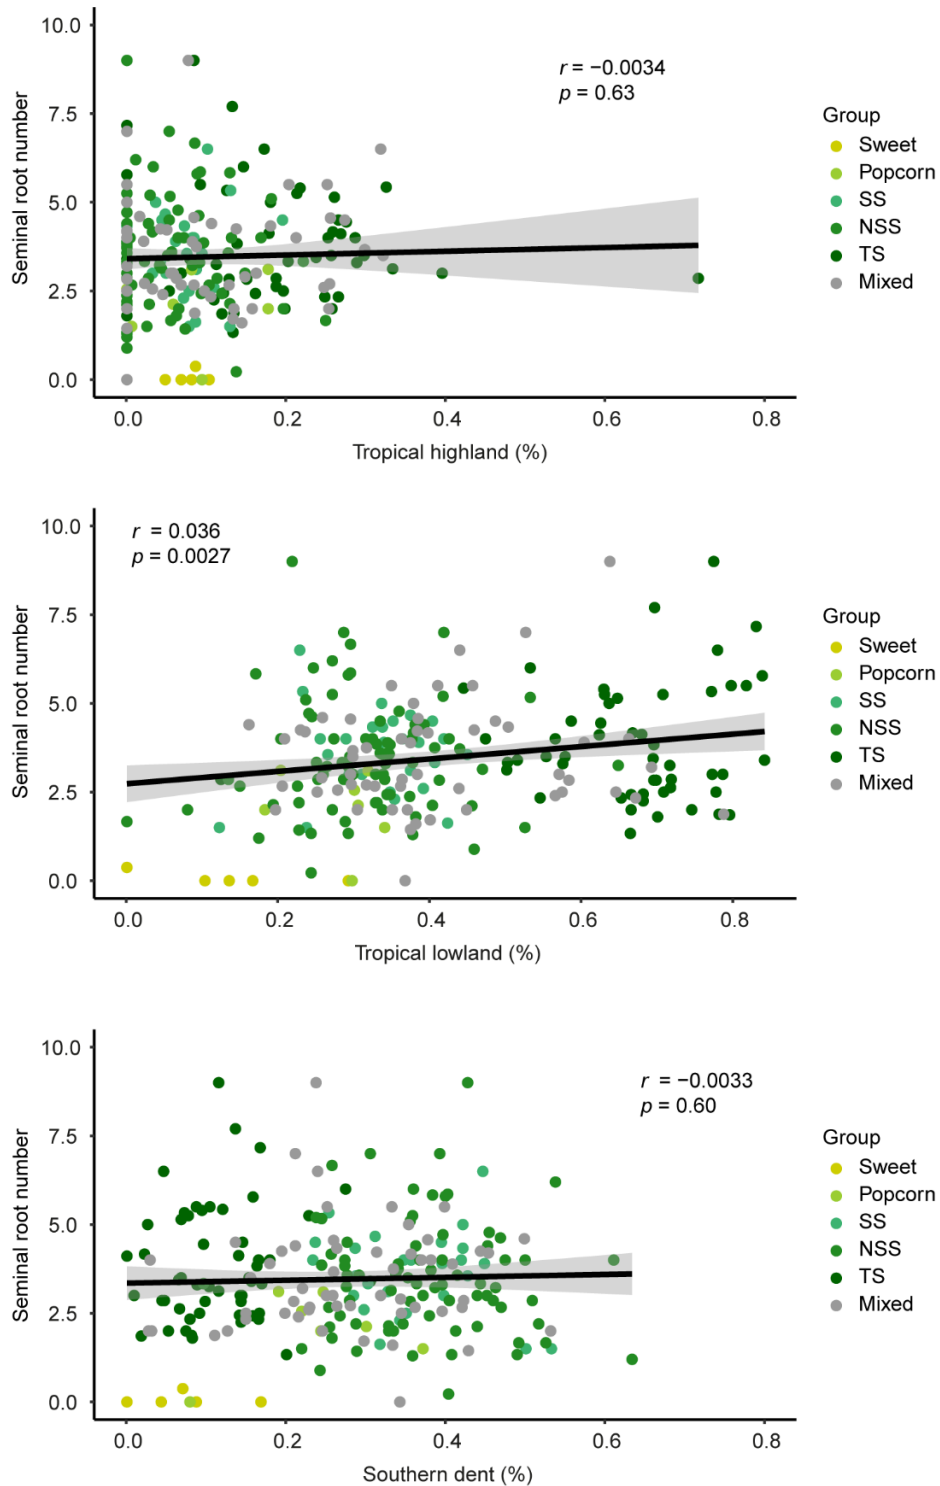

312 **Supplementary Fig. 7. Pearson correlation between the proportion of Tropical highland, Tropical**  
 313 **lowland, Southern dent germplasm and seminal root numbers in the US Ames panel ( $n = 225$ ).**  
 314 Estimates of historical sources for individual inbred lines were extracted from published articles<sup>43,44</sup>.  
 315 Here, the proportion of alleles from different germplasm pools (Tropical highland, Tropical lowland,  
 316 Southern dent) was correlated with the number of seminal roots in the corresponding maize inbred lines.  
 317 SS, stiff-stalk; NSS, non-stiff stalk; TS, tropical/sub-tropical. The  $p$  value denotes the probability at which  
 318 the correlation coefficient (solid line) is zero (null hypothesis) at 95% confidence interval (shaded area).  
 319 From a to c, two-sided tests of significance with Bonferroni correction were performed to adjust the  $P$   
 320 value for the multiple independent tests.

321

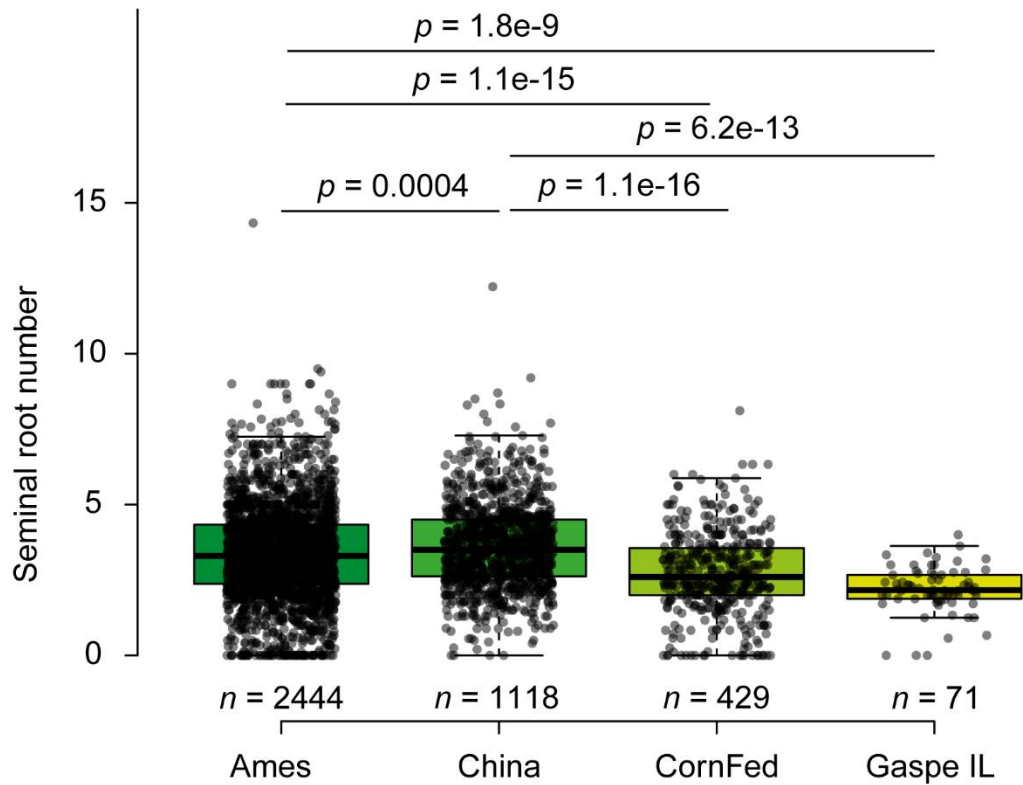

322

323 **Supplementary Fig. 8. Comparison of seminal root numbers among lines from different breeding**  
 324 **pools.** Examined maize lines derived from the U.S. Ames panel, inbred lines from China, the European  
 325 collection and the Gaspé flint introgression panel. The exact number of inbred lines are highlighted in  
 326 the figure.  $n = 10$  biologically independent seedlings per inbred line. Boxes span from the first to the  
 327 third quartiles, center lines represent the median values and whiskers extend to  $1.5\times$  the interquartile  
 328 range of the lower and upper quartiles. Data points outside of whiskers represent outliers. Significant  
 329 differences are indicated by exact values according to one-way ANOVA with Tukey HSD.

330



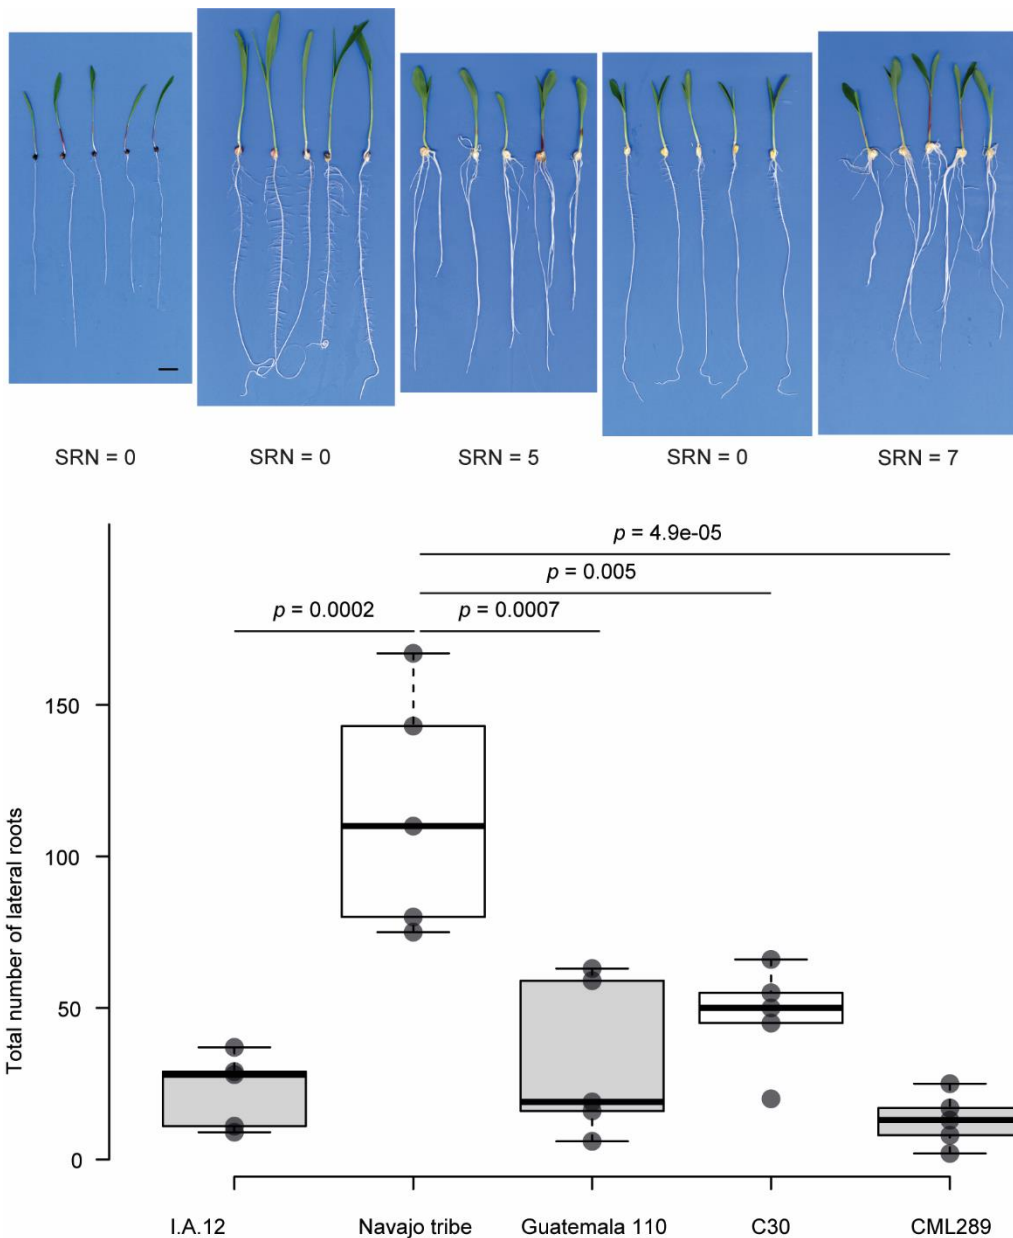

331 **Supplementary Fig. 9. Lateral root phenotype of representative maize varieties.** The seeds were  
 332 germinated for 10 days and scanned by an Epson 14000 scanner. Teosinte: I.A.12 (Ames 21793);  
 333 Traditional varieties: Navajo tribe (PI 311229); Guatemala 110 (PI 490825); Modern inbred lines: C30  
 334 (Ames 26815); CML289 (Ames 32336).  $n = 5$  biologically independent seedlings per genotype.  
 335 Statistical tests were performed by one-way ANOVA with Tukey HSD and labeled with exact values.  
 336 Boxes span from the first to the third quartiles, center lines represent the median values and whiskers  
 337 show data lying within 1.5x interquartile range of the lower and upper quartiles. Data points at the ends  
 338 of whiskers represent outliers. For all figure panels, scale bar = 2cm.

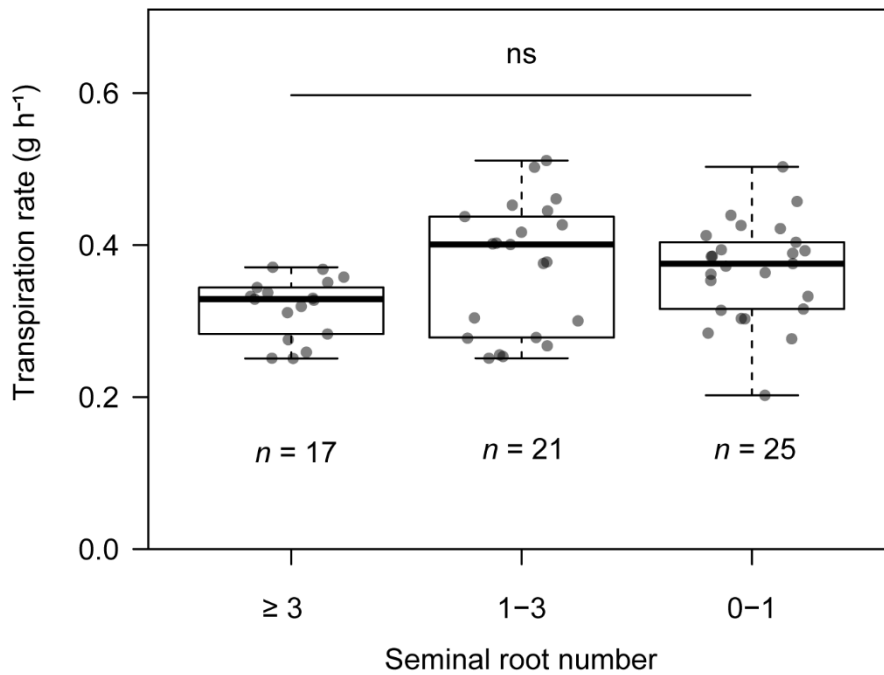

339 **Supplementary Fig. 10. Transpiration rate of maize traditional varieties with different seminal**  
 340 **root numbers.** The exact numbers of traditional varieties are highlighted in the figure. Transpiration  
 341 rates were determined gravimetrically by weighing the pots at three-hour intervals in three-week old  
 342 maize plants. At the end of the measurement the leaf area of each plant was measured by scanning  
 343 each leaf individually. Boxes span from the first to the third quartiles, center lines represent the median  
 344 values and whiskers expand to 1.5x the interquartile range of the lower and upper quartiles. Significant  
 345 differences were tested by one-way ANOVA with Tukey HSD at  $p = 0.05$ . ns, not significant.

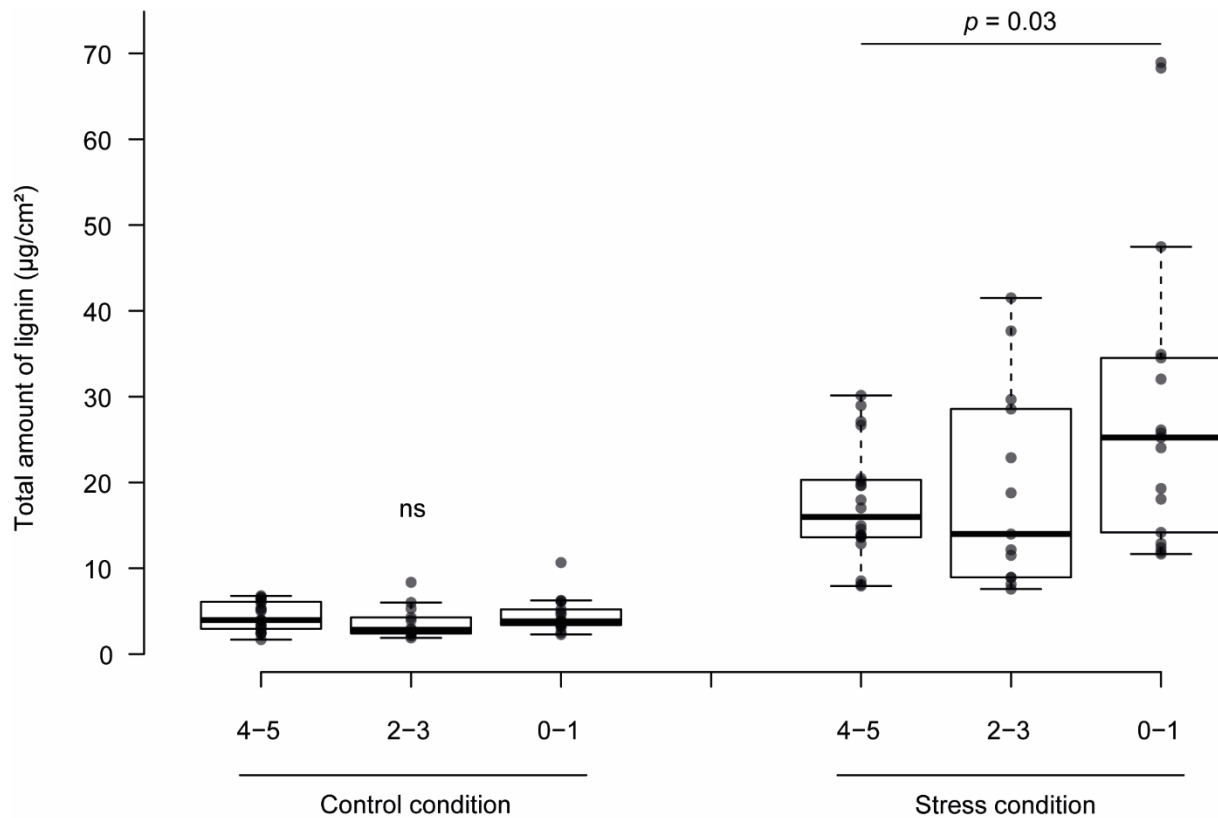

346  
 347 **Supplementary Fig. 11. Lignin density in roots of traditional varieties with different seminal root**  
 348 **numbers.** Roots were exposed to 160 mM NaCl solution to provoke osmotic stress in hydroponic plant  
 349 culture. Root tips were harvested and enzymatically digested using cellulase and pectinase, followed by  
 350 chemical analysis of lignin by thioacidolysis. The whole experiment was done for 50 traditional varieties  
 351 for each seminal root groups with 4 to 5 seminal roots ( $n = 20$ ), 2 to 3 seminal roots ( $n = 13$ ) and 0 to 1  
 352 seminal root ( $n = 17$ ), respectively. Boxes span from the first to the third quartiles, center lines represent  
 353 the median and whiskers extend to  $1.5\times$  the interquartile range of the lower and upper quartiles. Data  
 354 points outside of whiskers represent outliers. Statistical tests were performed by one-way ANOVA with  
 355 Tukey HSD and labeled with exact values. ns, not significant.

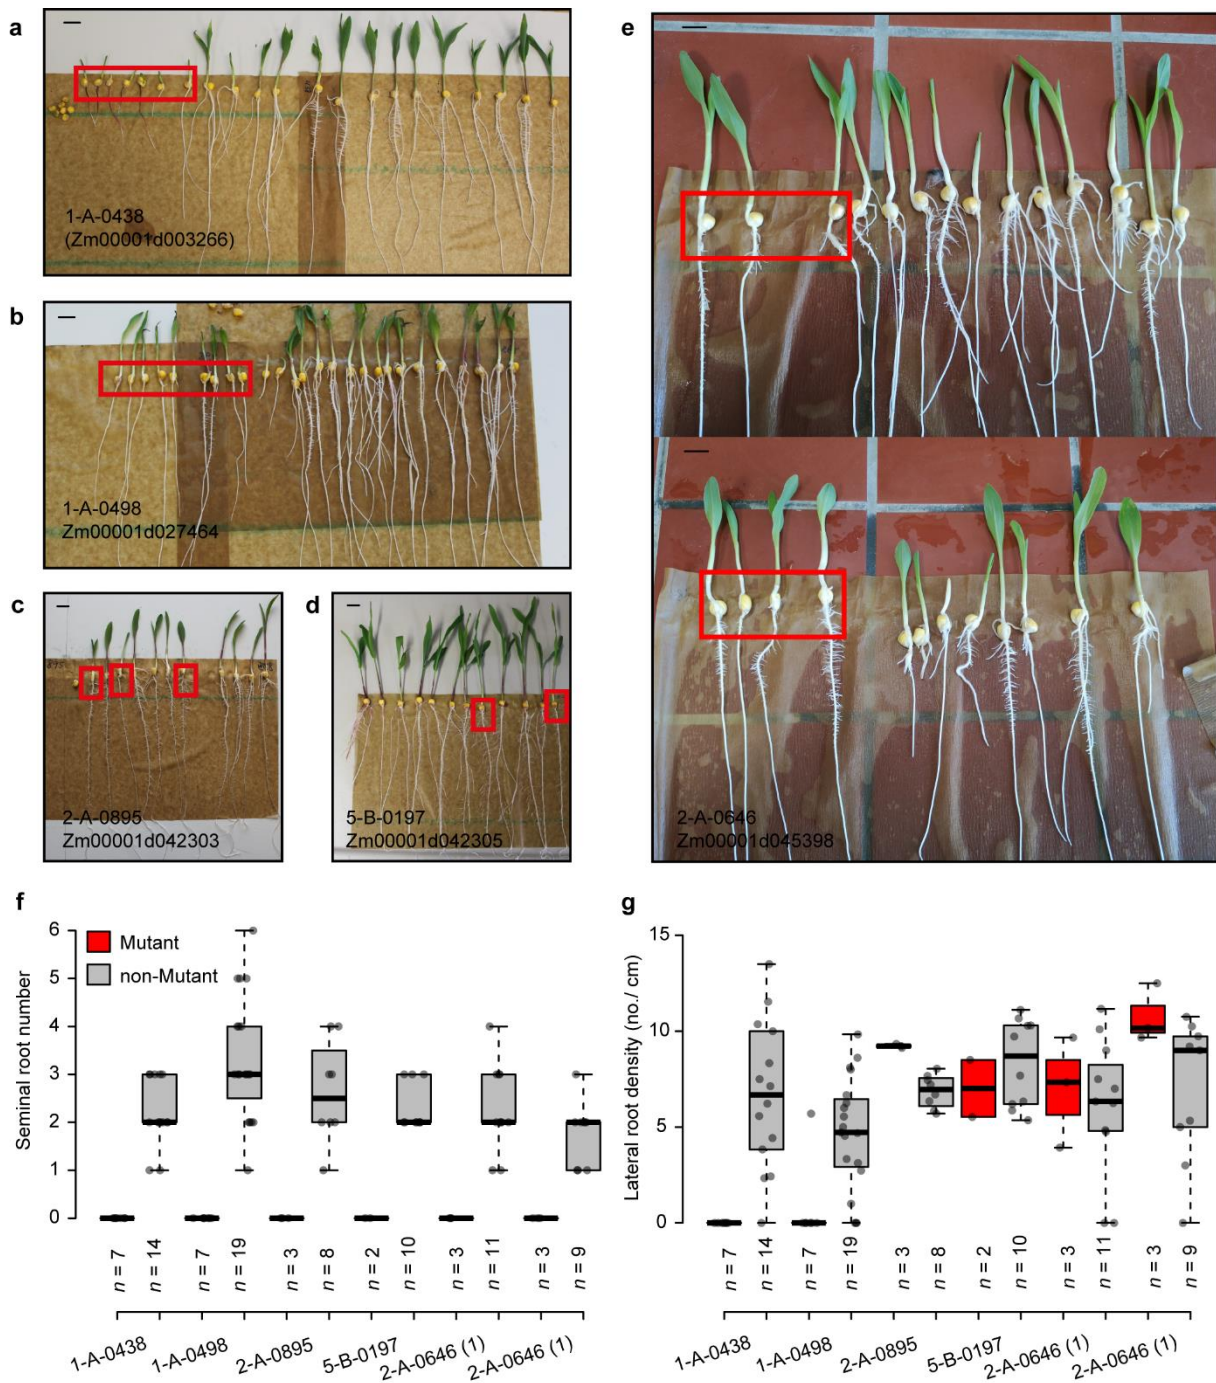

356

357 **Supplementary Fig. 12. Root phenotyping of candidate mutants in the *BonnMu* stock collection.**  
 358 **a-e**, Root phenotypes of five candidate genes. Mutant lines are labeled with red frames. Seminal root  
 359 number (**f**) and lateral root density (**g**) were illustrated by box plots. The exact number (n) of mutant or  
 360 non-mutant seedlings are highlighted in the figure. Boxes span from the first to the third quartiles, center  
 361 lines represent median values and whiskers show data lying within 1.5× interquartile range of the lower  
 362 and upper quartiles. Data points at the ends of whiskers represent outliers. 160 candidate genes  
 363 identified by GWAS were found in the *BonnMu* collection and germinated in paper rolls for 10 days  
 364 before photographs were taken. For all figure panels, scale bar = 2 cm.

365

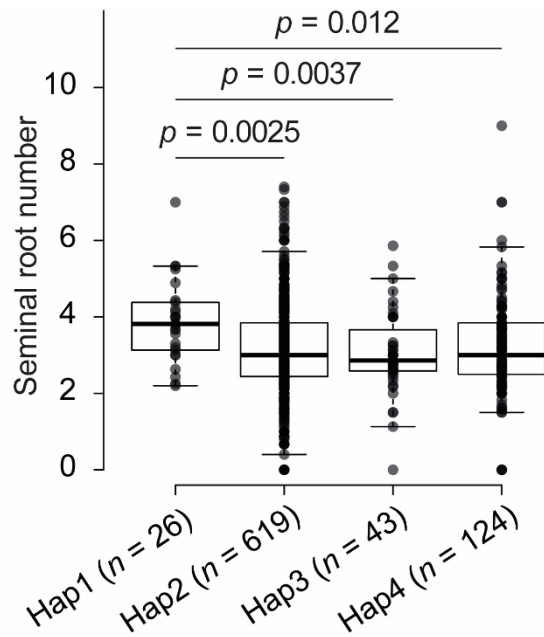

|   |   |   |   |             |
|---|---|---|---|-------------|
| G | G | C | G | SNP20632947 |
| T | T | G | T | SNP20632946 |
| C | G | G | G | SNP20632751 |
| G | G | T | T | SNP20632665 |
| A | C | C | C | SNP20632566 |

366 **Supplementary Fig. 13. Haplotype analysis of maize inbred lines.** The exact number (n) of inbred  
 367 lines are highlighted in the figure. Significant differences among haplotype groups are indicated by exact  
 368 values (one-way ANOVA, Tukey's HSD). Boxes span from the first to the third quartiles, center lines  
 369 represent median values and whiskers show data lying within 1.5× interquartile range of the lower and  
 370 upper quartiles. Data points at the ends of whiskers represent outliers.

371

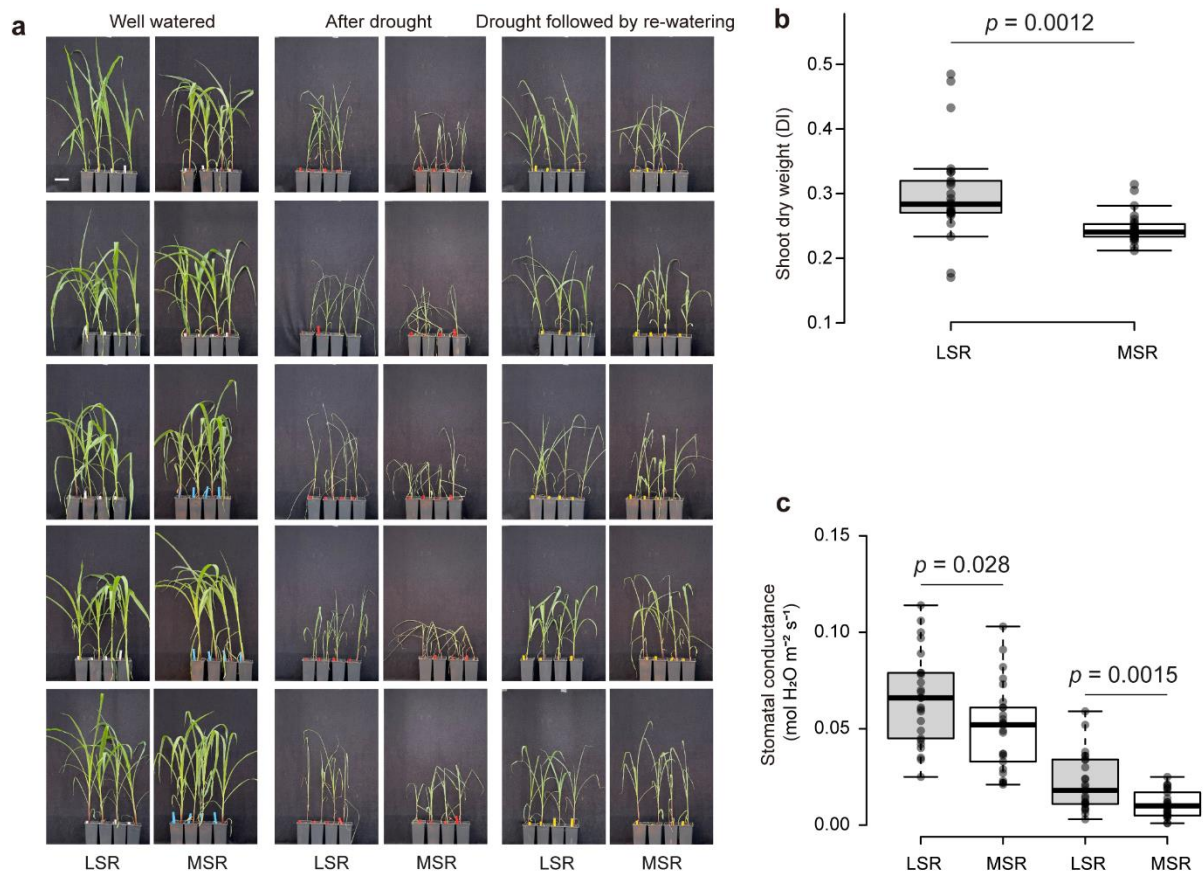

372

373 **Supplementary Fig. 14. Drought experiment using different traditional maize varieties.** (a)  
 374 Representative seedlings of Northern Flint sourced varieties ( $n = 5$ ) with less seminal roots (LSR) and  
 375 other traditional varieties ( $n = 5$ ) with more than 5 seminal roots (MSR) grown under well-watered,  
 376 drought and drought followed by re-watering conditions. Shoot dry biomass (b) and stomatal  
 377 conductance (c) of LSR and MSR varieties after re-watering. The Northern flint sourced varieties with  
 378 LSR are PI 213730, PI 213733, PI 213735, PI 213748 and PI 217410 are displayed from top to bottom.  
 379 The other dent or tropical sourced varieties with MSR are PI 213697, PI 221880, PI 222310, PI 222471  
 380 and PI 311235 accordingly. Boxes span from the first to the third quartiles, center lines represent median  
 381 values and whiskers show data lying within 1.5 $\times$  interquartile range of the lower and upper quartiles.  
 382 Data points at the ends of whiskers represent outliers. The exact  $p$  values were determined by two-sided  
 383 unpaired Student's  $t$  test. DI, drought index. For all figure panels, scale bar = 11 cm.

384

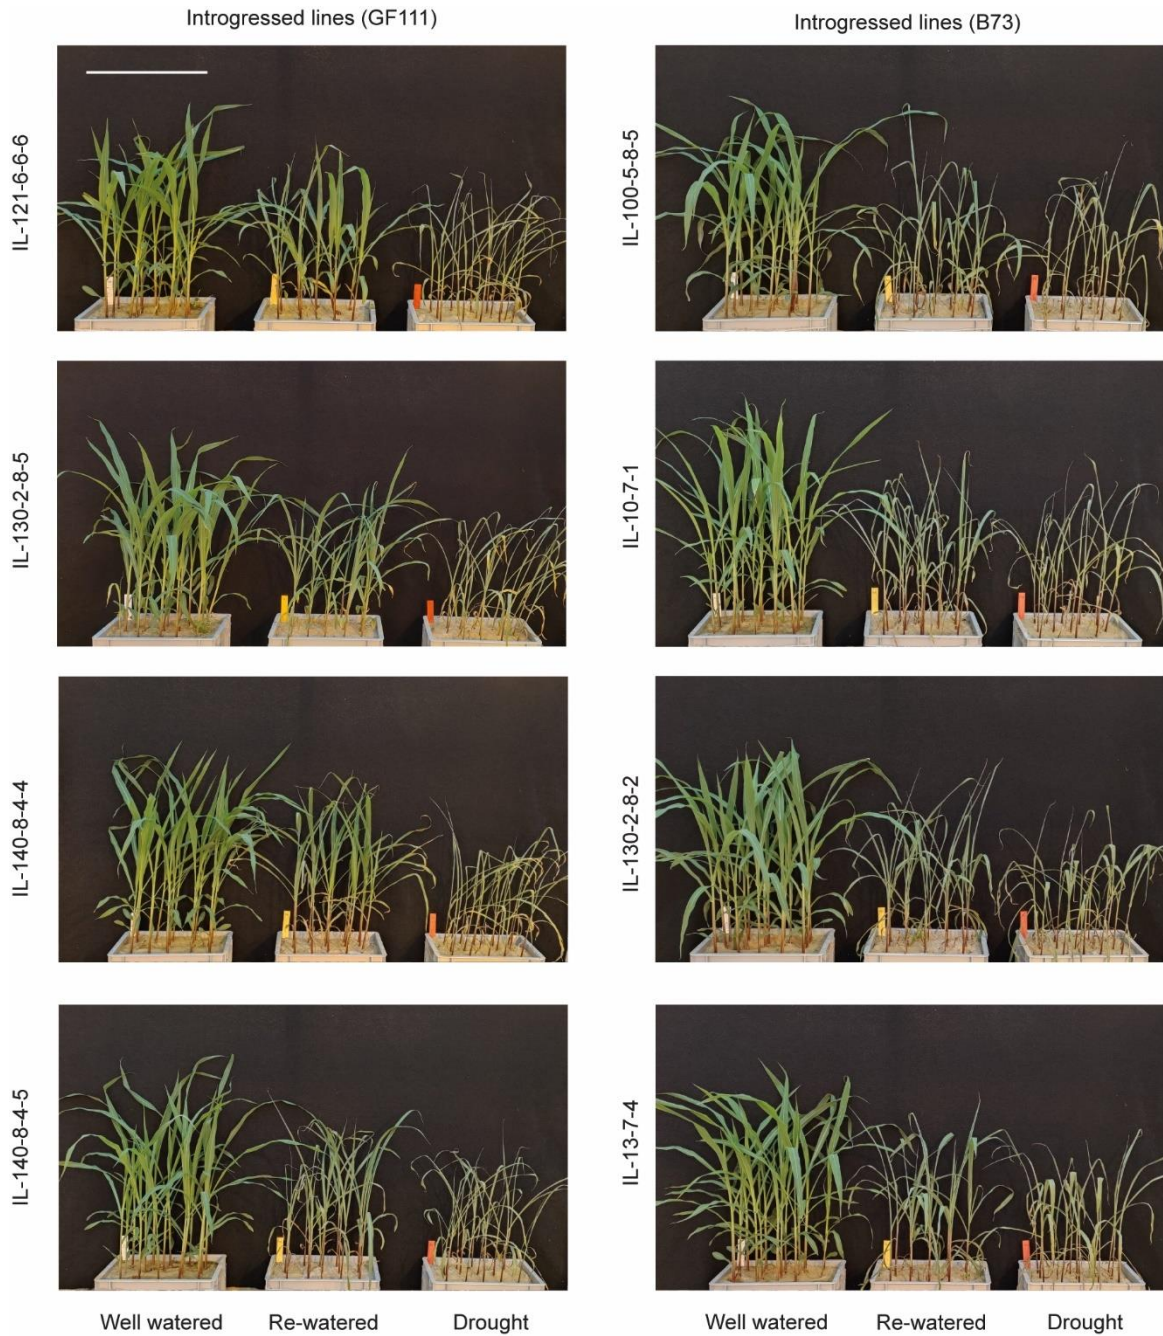

385

386 **Supplementary Fig. 15. Representative seedlings of different introgression lines grown under**  
 387 **well-watered, drought and drought followed by re-watering conditions.** Four GF111<sup>ZmHb77</sup>  
 388 introgression lines and another four B73<sup>ZmHb77</sup> introgression lines were displayed on the left and right,  
 389 respectively. GF111 is an inbred line, which was developed by repeated selfing (eight cycles) and  
 390 selection starting from the Northern Flint variety Gaspé Flint<sup>31</sup>. For all figure panels, scale bar = 30 cm.

391

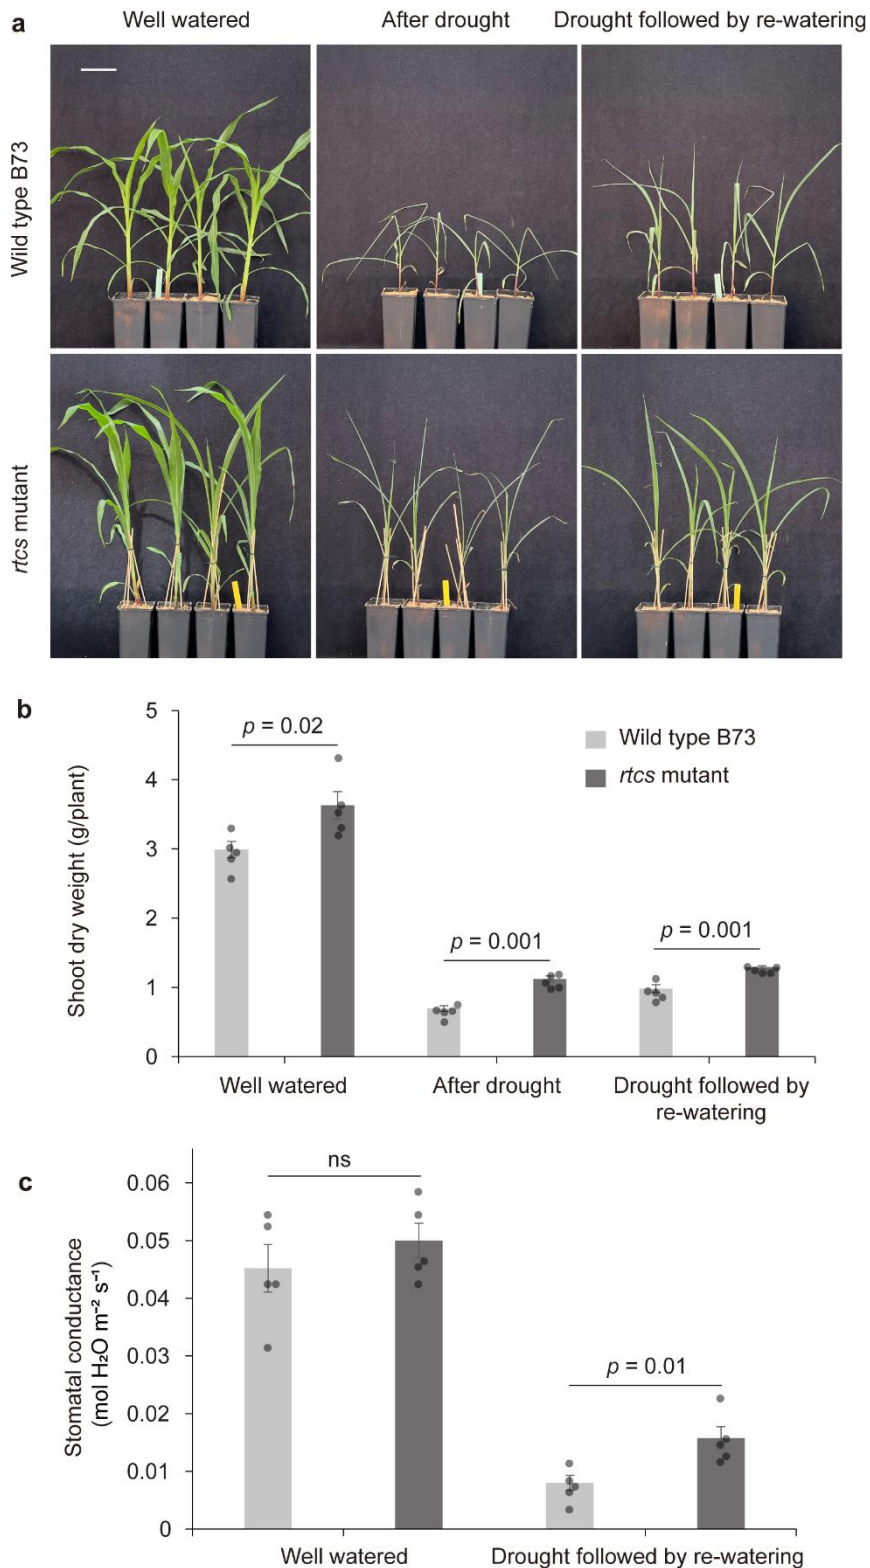

392 **Supplementary Fig. 16. Drought experiment using the *rtcs* mutant and its wild type siblings.** (a)  
 393 Representative seedlings of the *rtcs* mutant without seminal roots and wild type seedlings with three  
 394 seminal roots grown under well-watered, drought and drought followed by re-watering conditions. Shoot  
 395 dry biomass (b) and stomatal conductance (c) of these two genotypes grown under well-watered and  
 396 drought followed by re-watering conditions. The exact *p* values were determined by two-sided unpaired  
 397 Student's *t* test. Data are presented as mean values  $\pm$  SEM and  $n = 5$  biologically independent  
 398 replicates per treatment. ns, not significant. For all figure panels, scale bar = 11 cm.



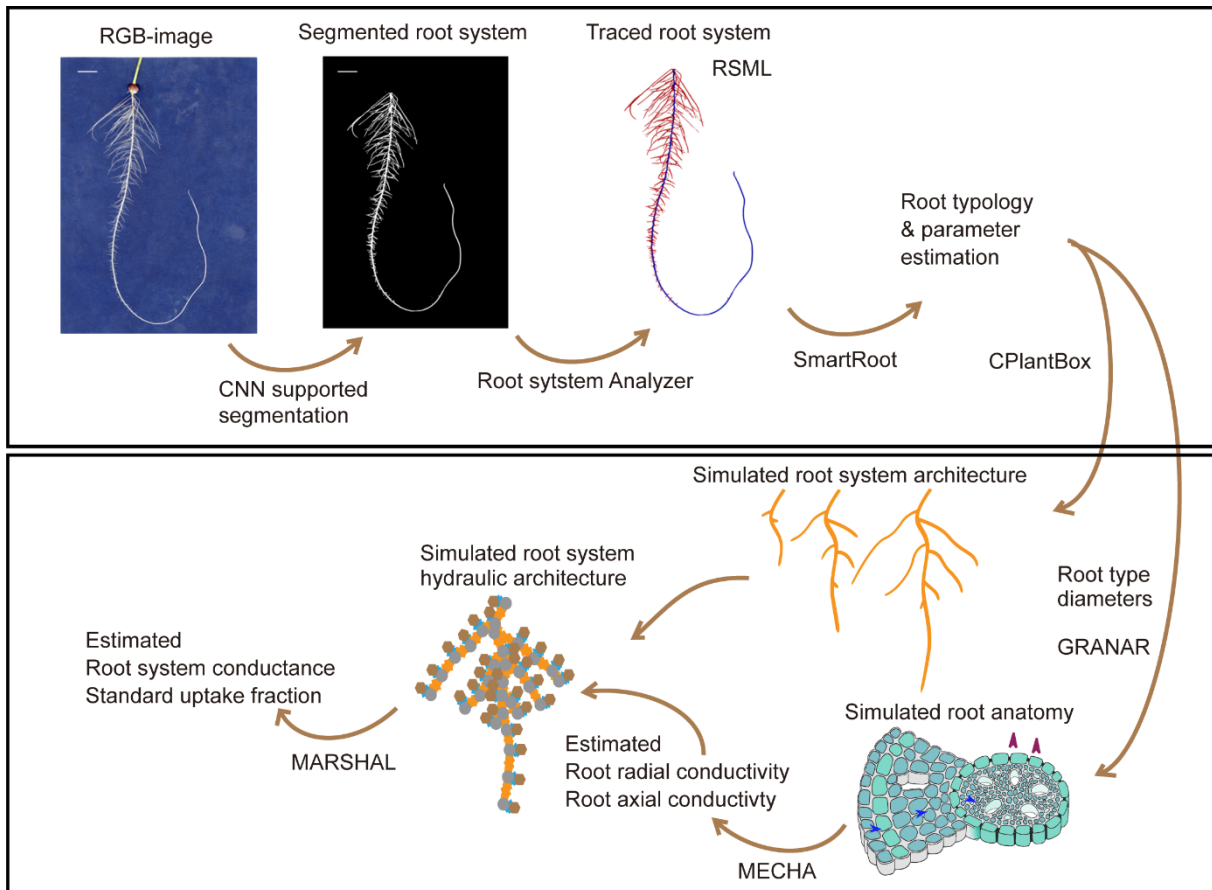

399

400

401

402

403

404

405

406

407

408

409

410

411

412

**Supplementary Fig. 17. A four-step structural-functional modelling pipeline to estimate hydraulic conductance in root systems.** The scanned RGB images were automatically segmented by a convolutional neural network (CNN) model with *RootPainter*. Scale bars = 2 cm. Each root system was traced with *Root System Analyzer* (RSA) and the start and end point of the primary and each seminal root was manually defined. A RSML-file was exported from RSA and migrated to *SmartRoot* for manually labelling of seminal roots. The parameter set was used to generate five realizations of virtual root systems with the stochastic *CPlantBox* model. The anatomical traits were referred to the published articles and created with the *GRANAR* model. The radial hydraulic conductivity and axial hydraulic conductance ( $k_r$  and  $k_x$ ) of these root anatomies were estimated with the model *MECHA*. From the *CPlantBox* root system architectures and their respective root hydraulic conductance, the whole root system conductance ( $K_{rs}$ ) and the standard uptake fractions (SUF) were determined with the model *MARSHAL* for each virtual root system.

413 **Supplementary references**

- 414 84. Hetz, W., Hochholdinger, F., Schwall, M. & Feix, G. Isolation and characterization of *rtcs*, a maize  
415 mutant deficient in the formation of nodal roots. *Plant J.* 10, 845–857 (1996).
- 416 85. Ruiz Corral, J. A. et al. Climatic adaptation and ecological descriptors of 42 Mexican maize races.  
417 *Crop Sci.* **48**, 1502–1512 (2008).
- 418 86. Perales, H. & Golicher, D. Mapping the diversity of maize races in Mexico. *PLoS ONE* **9**, e114657  
419 (2014).
- 420 87. Hufford, M. B., Martínez-Meyer, E., Gaut, B. S., Eguiarte, L. E. & Tenaillon, M. I. Inferences from  
421 the historical distribution of wild and domesticated maize provide ecological and evolutionary insight.  
422 *PLoS ONE* **7**, e47659 (2012).
- 423 88. Dell'Acqua, M. et al. Genetic properties of the MAGIC maize population: a new platform for high  
424 definition QTL mapping in *Zea mays*. *Genome Biol.* **16**, 167 (2015).
- 425 89. van Dusschoten D. et al. Quantitative 3D analysis of plant roots growing in soil using magnetic  
426 resonance imaging. *Plant Physiol.* **170**, 1176–1188 (2016).
- 427 90. Jung, B. A. & Weigel, M. Spin echo magnetic resonance imaging. *J. Magn. Reson. Imaging* **37**,  
428 805–817 (2013).
- 429 91. Carminati, A. & Javaux, M. Soil rather than xylem vulnerability controls stomatal response to drought.  
430 *Trends Plant Sci.* **25**, 868–880 (2020).
- 431 92. Abdalla, M., Carminati, A., Cai, G., Javaux, M. & Ahmed, M. A. Stomatal closure of tomato under  
432 drought is driven by an increase in soil–root hydraulic resistance. *Plant Cell Environ.* **44**, 425–431  
433 (2021).
- 434 93. Cai, G., Ahmed, M. A., Abdalla, M. & Carminati, A. Root hydraulic phenotypes impacting water  
435 uptake in drying soils. *Plant Cell Environ.* **45**, 650–663 (2022).
- 436 94. Brooks, R. H. & Corey, A. T. Properties of porous media affecting fluid flow. *J. Irrig. Drain. Eng.* **92**,  
437 61–88 (1966).
- 438 95. Peters, A., Iden, S. C. & Durner, W. Revisiting the simplified evaporation method: Identification of  
439 hydraulic functions considering vapor, film and corner flow. *J. Hydrol.* **527**, 531–542 (2015).
- 440 96. De Jong Van Lier, Q., Van Dam, J. C., Metselaar, K., De Jong, R. & Duijnisveld, W. H. M.  
441 Macroscopic root water uptake distribution using a matric flux potential approach. *Vadose Zone J.*  
442 **7**, 1065 (2008).
- 443 97. Schröder, T., Javaux, M., Vanderborght, J., Körfgen, B. & Vereecken, H. Implementation of a  
444 microscopic soil–root hydraulic conductivity drop function in a three-dimensional soil–root  
445 architecture water transfer model. *Vadose Zone J.* **8**, 783–792 (2009).
- 446 98. Foster, C. E., Martin, T. M. & Pauly, M. Comprehensive compositional analysis of plant cell walls  
447 (Lignocellulosic biomass) part I: lignin *JoVE* 37, p.e1745 (2010).
- 448 99. Qi, Q. et al. Rapid, simplified microscale quantitative analysis of lignin H/G/S composition with GC–  
449 MS in glass ampules and glass capillaries. *MethodsX* **6**, 2592–2600 (2019).
- 450 100. Rolando, C., Monties, B. & Lapierre, C. Thioacidolysis. In *Methods in lignin chemistry*. Springer  
451 Berlin Heidelberg (1992).

452 101. Zeier, J. & Schreiber, L. Chemical composition of hypodermal and endodermal cell walls and  
453 xylem vessels isolated from *Clivia miniata* (identification of the biopolymers lignin and suberin). *Plant*  
454 *Physiol.* **113**, 1223–1231 (1997).

455 102. Delgado-Baquerizo, M. et al. Palaeoclimate explains a unique proportion of the global variation  
456 in soil bacterial communities. *Nat. Eco. Evo.* **1**, 1339–1347 (2017).

457
